# Supplementary material for: Acute In Vivo Administration of Compound 21 Stimulates Akt and ERK1/2 Phosphorylation in Mouse Heart and Adipose Tissue
Source: MDPI journal article supplement (doi:10.3390/ijms242316839), 2023-11-28
Supplement: s1 [file s1]

**Table S1.** List of antibodies.

| <b>Name</b>                                 | <b>Source</b>             | <b>Catalog #</b> |
|---------------------------------------------|---------------------------|------------------|
| Phospho-IR/IGF1R<br>Tyr1158/Tyr1162/Tyr1163 | Millipore                 | 07-841           |
| IR $\beta$ subunit                          | GeneTex                   | GTX101136        |
| Phospho-Ser 473 Akt                         | Cell Signaling Technology | 4060             |
| Akt                                         | Cell Signaling Technology | 4691             |
| Phospho-Thr202/Tyr204 ERK1/2                | Cell Signaling Technology | 4370             |
| ERK1/2                                      | Cell Signaling Technology | 9102             |
